# Supplementary material for: Peptidomics Unveils Distinct Acetylation Patterns of Histone and Annexin A1 in Differentiated Thyroid Cancer
Source: MDPI journal article supplement (doi:10.3390/ijms25010376), 2023-12-27
Supplement: s1 [file s1]

# Peptidomics Unveils Distinct Acetylation Patterns of Histone and Annexin A1 in Differentiated Thyroid Cancer

## Supplementary material

### Tables

**Table S1.** Discrimination of the thyroid nodules of the entire studied population. Diagnosis by fine-needle aspiration biopsy (FNAB) cytology [The 2023 Bethesda System for Reporting Thyroid Cytopathology (Ali, Baloch et al. 2023)] and histology diagnosis [The 2022 WHO Classification of Thyroid Neoplasms (Lloyd, Osamura et al. 2022)] of all samples, including subtypes in parenthesis. Plus, discrimination of the thyroid nodules used for HR-MAS <sup>1</sup>H NMR metabolomics. Abbreviations: AUS – atypia of undetermined significance; BT – benign tumours; FTC – follicular thyroid carcinoma; PTC – papillary thyroid carcinoma.

| Individual | Sample | Cytology diagnosis            | Histology diagnosis             | HR-MAS <sup>1</sup> H NMR |
|------------|--------|-------------------------------|---------------------------------|---------------------------|
| TR008      | A      | AUS                           | BT (Follicular adenoma)         |                           |
| TR012      | A      | Benign                        | BT (Follicular nodular disease) | ✓                         |
|            | B      | Benign                        | BT (Follicular nodular disease) |                           |
| TR013      | A      | Follicular tumour             | PTC (Follicular)                | ✓                         |
| TR014      | A      | Benign                        | BT (Follicular nodular disease) |                           |
|            | B      |                               | BT (Follicular nodular disease) |                           |
|            | C      |                               | BT (Follicular nodular disease) |                           |
| TR015      | A      |                               | BT (Follicular nodular disease) |                           |
|            | B      |                               | BT (Follicular nodular disease) |                           |
| TR018      | A      | Benign                        | BT (Follicular nodular disease) | ✓                         |
| TR019      | A      | Benign                        | BT (Follicular nodular disease) |                           |
|            | B      |                               | BT (Follicular nodular disease) |                           |
| TR020      | A      | Follicular tumour (oncocytic) | FTC (Oncocytic)                 | ✓                         |
| TR021      | A      | Benign                        | BT (Follicular adenoma)         | ✓                         |
|            | B      | AUS                           | BT (Follicular nodular disease) |                           |
| TR023      | A      | Benign                        | BT (Follicular nodular disease) |                           |
| TR025      | A      |                               | BT (Follicular nodular disease) |                           |
|            | B      |                               | BT (Follicular nodular disease) |                           |
|            | C      |                               | BT (Follicular nodular disease) |                           |
| TR026      | A      | Follicular tumour             | BT (Follicular nodular disease) | ✓                         |
|            | B      |                               | BT (Follicular nodular disease) |                           |
| TR028      | A      | Follicular tumour             | PTC (Follicular and solid)      | ✓                         |
| TR029      | A      | Benign                        | BT (Follicular nodular disease) |                           |
| TR030      | A      |                               | BT (Follicular nodular disease) |                           |
| TR031      | A      | Benign                        | BT (Follicular nodular disease) | ✓                         |
|            | B      |                               | BT (Follicular nodular disease) |                           |
| TR032      | A      | Follicular tumour             | PTC (Follicular)                | ✓                         |
| TR034      | A      | Papillary carcinoma           | PTC (Classical and follicular)  | ✓                         |
|            | B      |                               | PTC (Classical and follicular)  |                           |
| TR035      | A      | Benign                        | BT (Follicular nodular disease) |                           |
| TR037      | A      |                               | BT (Follicular nodular disease) | ✓                         |
|            | B      |                               | BT (Follicular nodular disease) |                           |
|            | C      |                               | BT (Follicular nodular disease) |                           |
|            | D      |                               | BT (Follicular nodular disease) |                           |
| TR038      | A      | Non-diagnostic                | BT (Follicular adenoma)         | ✓                         |
|            | B      |                               | BT (Follicular nodular disease) |                           |
| TR039      | A      | Benign                        | BT (Follicular nodular disease) | ✓                         |
| TR040      | A      | Benign                        | BT (Follicular nodular disease) | ✓                         |
|            | B      |                               | BT (Follicular nodular disease) |                           |
| TR041      | A      | Benign                        | BT (Follicular nodular disease) |                           |
| TR043      | A      | Benign                        | BT (Follicular nodular disease) |                           |
|            | B      |                               | BT (Follicular nodular disease) |                           |
|            | C      |                               | BT (Follicular nodular disease) |                           |
|            | D      |                               | BT (Follicular nodular disease) |                           |
| TR045      | A      | Non-diagnostic                | BT (Follicular nodular disease) |                           |
|            | B      |                               | BT (Follicular nodular disease) |                           |
| TR046      | A      | Benign                        | BT (Follicular nodular disease) |                           |
|            | B      | Benign                        | BT (Follicular nodular disease) |                           |
| TR047      | A      | Benign                        | BT (Follicular nodular disease) | ✓                         |
|            | B      |                               | BT (Follicular nodular disease) |                           |
| TR048      | A      | Benign                        | BT (Follicular nodular disease) | ✓                         |
| TR049      | A      | Benign                        | BT (Follicular nodular disease) |                           |

|             |       |           |                     |                                 |                                       |
|-------------|-------|-----------|---------------------|---------------------------------|---------------------------------------|
|             | TR050 | A         | Papillary carcinoma | PTC (Classical and follicular)  | ✓                                     |
|             | TR051 | A         | Papillary carcinoma | PTC (Classical)                 | ✓                                     |
|             | TR052 | A         | Benign              | BT (Follicular nodular disease) |                                       |
|             |       | B         | Benign              | BT (Follicular nodular disease) |                                       |
|             | TR053 | A         | Papillary carcinoma | PTC (Classical)                 | ✓                                     |
|             | TR054 | A         | Papillary carcinoma | PTC (Diffuse sclerosing)        | ✓                                     |
|             | TR055 | A         | Papillary carcinoma | PTC (Classical)                 | ✓                                     |
|             | TR056 | A         | Benign              | BT (Follicular nodular disease) | ✓                                     |
|             |       | B         | Benign              | BT (Follicular nodular disease) |                                       |
|             | TR057 | A         | Non-diagnostic      | BT (Follicular nodular disease) | ✓                                     |
|             | TR058 | A         | Non-diagnostic      | BT (Follicular nodular disease) |                                       |
|             |       | B         |                     | BT (Follicular nodular disease) |                                       |
|             | TR059 | A         | Benign              | BT (Follicular nodular disease) |                                       |
|             | TR060 | A         | Benign              | BT (Follicular nodular disease) |                                       |
|             |       | B         | Benign              | BT (Follicular nodular disease) |                                       |
|             |       | C         | Benign              | BT (Follicular nodular disease) |                                       |
|             | TR061 | A         | Benign              | BT (Follicular nodular disease) |                                       |
|             |       | B         | Benign              | BT (Follicular nodular disease) |                                       |
|             | TR063 | A         | Oncocytic adenoma   | BT (Oncocytic adenoma)          |                                       |
| Individuals | 43    |           | Non-diagnostic      | 4                               | Inadequate or different from cytology |
|             |       |           | AUS                 | 2                               |                                       |
|             |       | 8 (15.7%) |                     |                                 |                                       |

In the sample column different letters represent different nodules studied for the same individual.

**Table S2.** Top 20 statistically different proteins and peptides with fold-change (FC), p-value from the Mann-Whitney test and adjusted p-value based on FDR (Adj p-value).

| Protein      | FC    | p-value  | Adj p-value |
|--------------|-------|----------|-------------|
| P04083 ANXA1 | 2.44  | 2.74E-07 | 1.48E-04    |
| Q9UKK3 PARP4 | 2.25  | 5.80E-07 | 1.48E-04    |
| P08727 K1C19 | 4.24  | 5.80E-07 | 1.48E-04    |
| P50995 ANX11 | 1.58  | 5.80E-07 | 1.48E-04    |
| Q9UPN3 MACF1 | 1.28  | 7.41E-07 | 1.48E-04    |
| Q9NZM1 MYOF  | 1.44  | 7.42E-07 | 1.48E-04    |
| P06753 TPM3  | 1.7   | 8.05E-07 | 1.48E-04    |
| Q15149 PLEC  | 1.7   | 8.05E-07 | 1.48E-04    |
| Q99536 VAT1  | 1.09  | 8.05E-07 | 1.48E-04    |
| P02763 A1AG1 | -3.02 | 8.73E-07 | 1.48E-04    |
| O60831 PRAF2 | 1.41  | 9.08E-07 | 1.48E-04    |
| Q6UX53 MET7B | 4.21  | 9.46E-07 | 1.48E-04    |
| Q9BUF5 TBB6  | 1.35  | 9.47E-07 | 1.48E-04    |
| Q14195 DPYL3 | 2.17  | 1.11E-06 | 1.48E-04    |
| Q9BTV4 TMM43 | 1.95  | 1.21E-06 | 1.48E-04    |
| Q9BSJ8 ESYT1 | 1.36  | 1.21E-06 | 1.48E-04    |
| P46821 MAP1B | 2.09  | 1.53E-06 | 1.48E-04    |
| Q9P2R3 ANFY1 | 0.92  | 1.66E-06 | 1.48E-04    |
| Q13509 TBB3  | 2.98  | 1.66E-06 | 1.48E-04    |
| P02545 LMNA  | 1.28  | 1.66E-06 | 1.48E-04    |

  

| Peptides                                 | FC    | p-value  | Adj p-value |
|------------------------------------------|-------|----------|-------------|
| P16402 H13 [1Ac]-SETAPLAPTIPAPAEKTPVKK   | 4.88  | 1.31E-06 | 1.16E-04    |
| P10412 H14 SETAPAAPAAPAPAEKTPVK          | 3.22  | 2.27E-06 | 1.16E-04    |
| P08670 VIME FGGPGTASRPSS                 | 2.59  | 3.10E-06 | 1.16E-04    |
| P10412 H14 [1Ac]-SETAPAAPAAPAPAEKTPVKK   | 3.72  | 3.10E-06 | 1.16E-04    |
| P16403 H12 [1Ac]-SETAPAAPAAAPAEKAPVKK    | 3.16  | 6.63E-06 | 1.98E-04    |
| Q9Y3U8 RL36 ALRYPMAY                     | 2.70  | 8.29E-06 | 2.05E-04    |
| O00479 HMG4 DASTLQSQKAEGTGDAK            | 2.07  | 9.62E-06 | 2.05E-04    |
| Q5VTE0 EF1A3 [1Ac]-GKEKTHINIVVIGHVDSGKST | 3.73  | 1.98E-05 | 3.69E-04    |
| P16403 H12 [1Ac]-SETAPAAPAAAPAEK         | 3.79  | 2.82E-05 | 4.32E-04    |
| P10412 H14 [1Ac]-SETAPAAPAAPAPAEKTPVKKK  | 2.73  | 3.03E-05 | 4.32E-04    |
| Q9BX97 PLVAP GLAMEHGGSYA                 | -2.47 | 3.25E-05 | 4.32E-04    |
| P04083 ANXA1 [1Ac]-AMVSEFLKQ             | 3.90  | 3.48E-05 | 4.32E-04    |
| P16402 H13 [1Ac]-SETAPLAPTIPAPAEKTPVKKK  | 3.76  | 3.99E-05 | 4.55E-04    |
| P10809 CH60 AKDVKFGADARALMLQGVDLLADAVAV  | 2.61  | 4.28E-05 | 4.55E-04    |
| Q5VTE0 EF1A3 IGGIGTVPVGRVETGVLPKPG       | 3.19  | 5.25E-05 | 5.21E-04    |
| P02671 FIBA SQLQKVPPEWKALTDMPQM          | -2.60 | 6.87E-05 | 5.76E-04    |
| P60709 ACTB FAGDDAPRAVFPISIVGRPR         | 4.91  | 7.35E-05 | 5.76E-04    |
| P47914 RL29 AAAPASVPAQAPKR               | 3.15  | 7.35E-05 | 5.76E-04    |
| P16402 H13 [1Ac]-SETAPLAPTIPAPAEK        | 2.71  | 7.35E-05 | 5.76E-04    |
| P08729 K2C7 [1Ac]-SIHFSSPVFTSRSA         | -2.59 | 0.000116 | 8.67E-04    |

## Figures

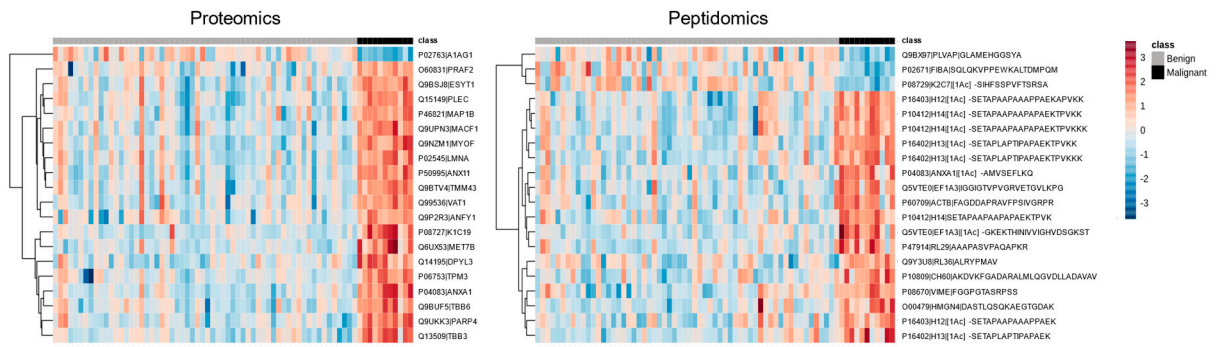

**Figure S1. Heatmap with hierarchical clustering of top 20 statistically different proteins (left panel) and peptides (right panel).** Euclidean distance measure and ward clustering method. Proteins are represented by their Uniprot accession number and entry name. Peptides are identified by their protein the same way, plus the one code amino acid sequence.

## References

- Ali, S. Z., Z. W. Baloch, B. Cochand-Priollet, F. C. Schmitt, P. Vielh and P. A. VanderLaan (2023). "The 2023 Bethesda System for Reporting Thyroid Cytopathology." *Thyroid*.
- Lloyd, R., R. Osamura and J. Rosai (2022). *WHO Classification of Tumours Editorial Board. Endocrine and Neuroendocrine tumours*, Lyon: IARC.
